# Supplementary material for: Water Uptake as a Crucial Factor on the Properties of Cryogels of Gelatine Cross-Linked by Dextran Dialdehyde
Source: MDPI journal article supplement (doi:10.3390/gels7040159), 2021-09-30
Supplement: s1 [file s1]

# Water Uptake as a Crucial Factor on the Properties of Cryogels of Gelatine Cross-Linked by Dextran Dialdehyde

Natalia Volkova <sup>1,2</sup> and Dmitriy Berillo <sup>1,3,\*</sup>

<sup>1</sup> Department of Biotechnology, Lund University, P.O. Box 124, 22 100 Lund, Sweden;  
natalia.volkova@ftf.lth.se

<sup>2</sup> Department of Solid State Physics, Lund University, Box 118, 221 00 Lund, Sweden

<sup>3</sup> Department of Pharmaceutical and Toxicological Chemistry, Pharmacognosy and Botany School of Pharmacy, Asfendiyarov Kazakh National Medical University, Almaty 050000, Kazakhstan

\* Correspondence: berillo.d@kaznmu.kz

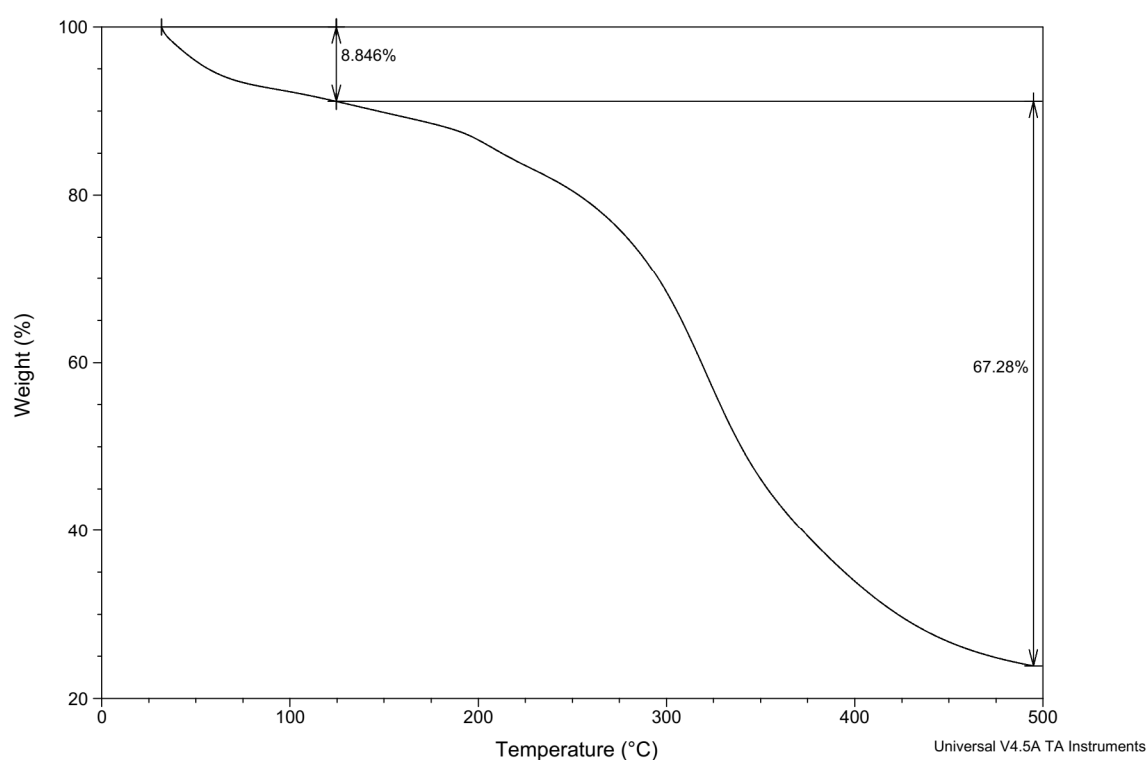

**Figure S1.** TGA analysis of Gel-DDA 3:1 cryogel.

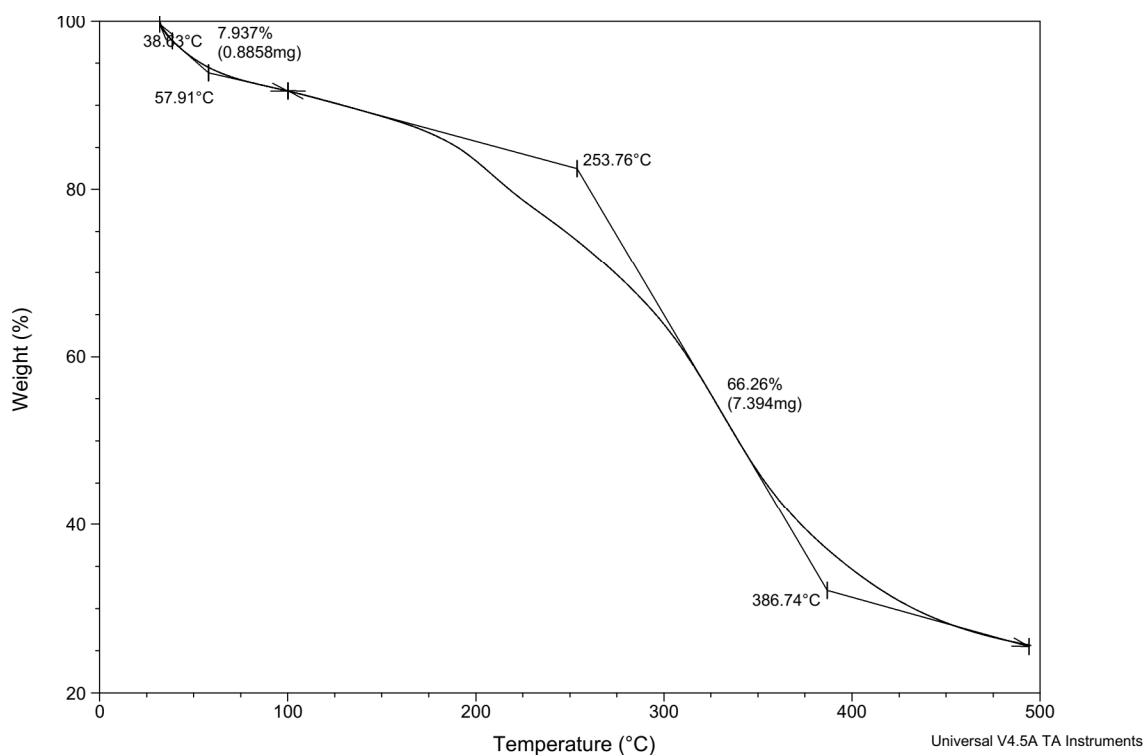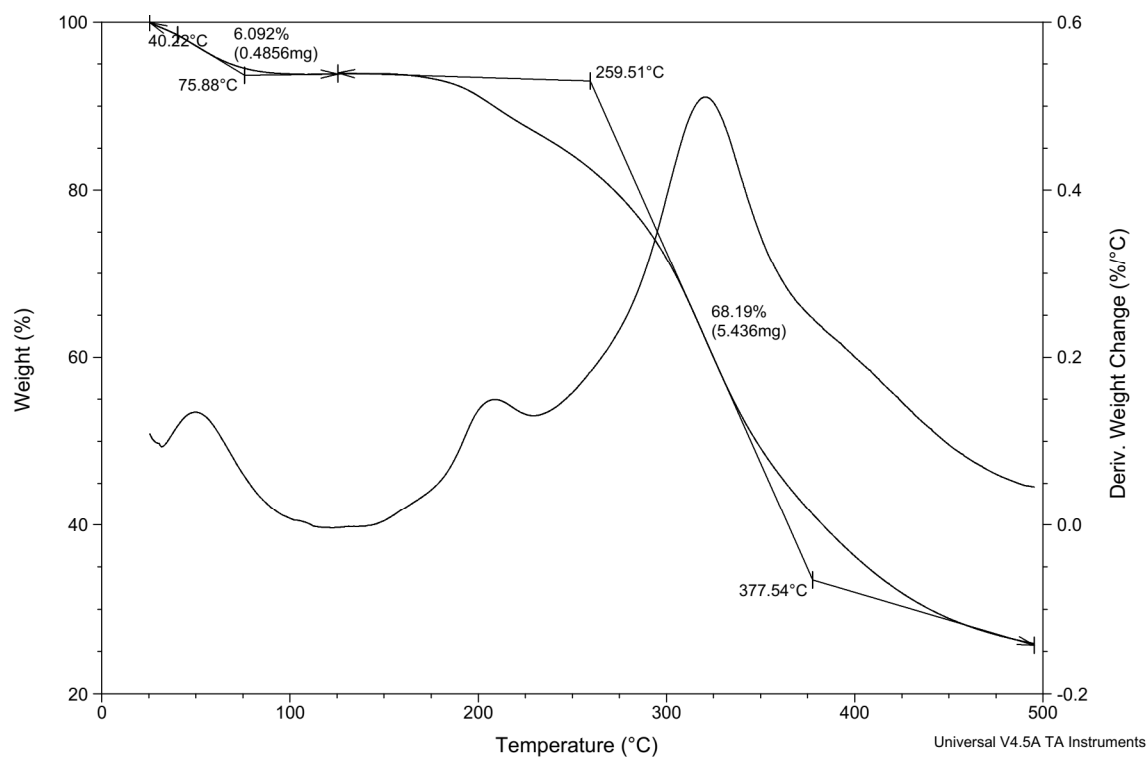

**Figure S2.** TGA analysis of Gel-DDA 1:1 cryogels different batches.

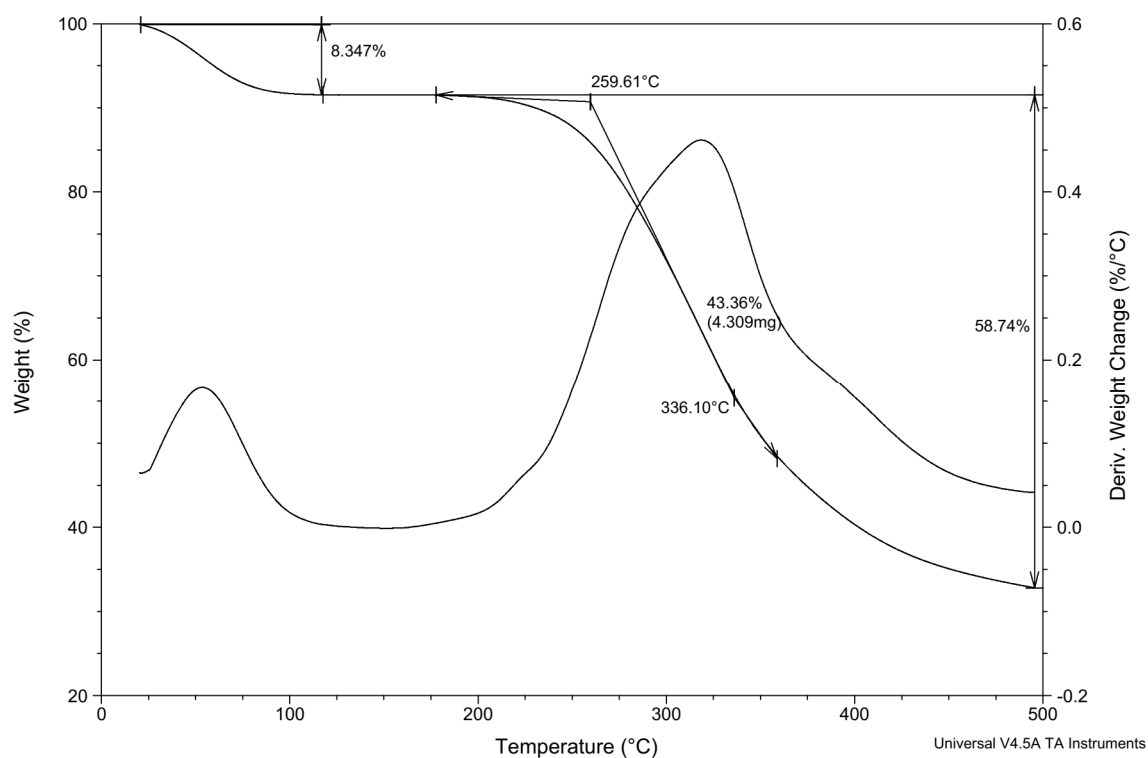

**Figure S3.** TGA analysis of Gel-GA 6:1 cryogel.

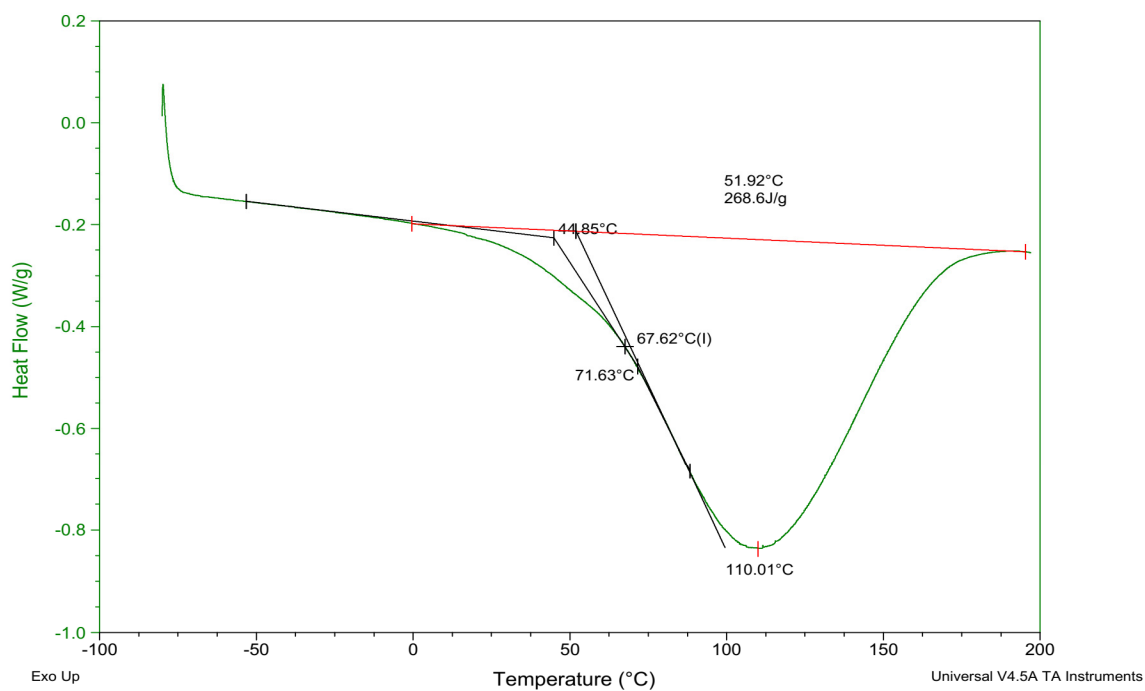

**Figure S4.** DSC analysis of Gel-DDA 1:1 cryogel after treatment with 100% RH and drying.

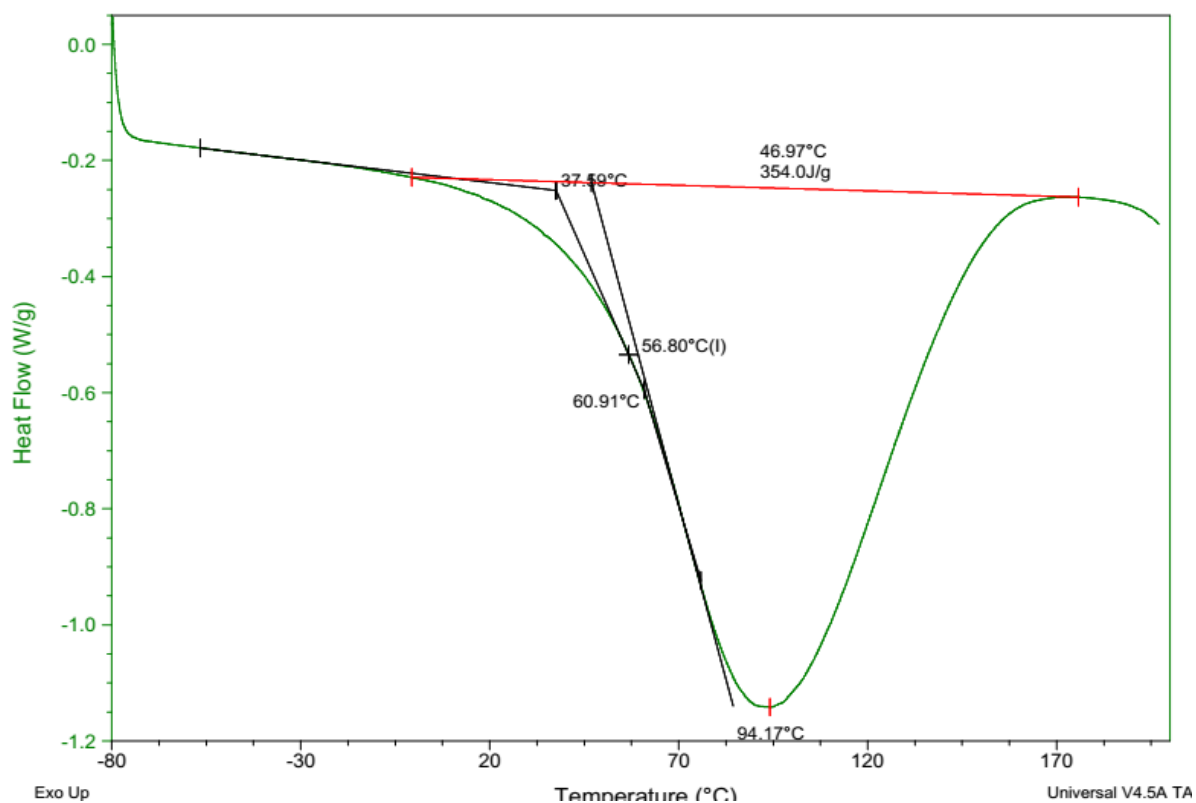

**Figure S5.** DSC analysis of Gel-DDA 3:1 cryogel after treatment with 100% RH and drying.

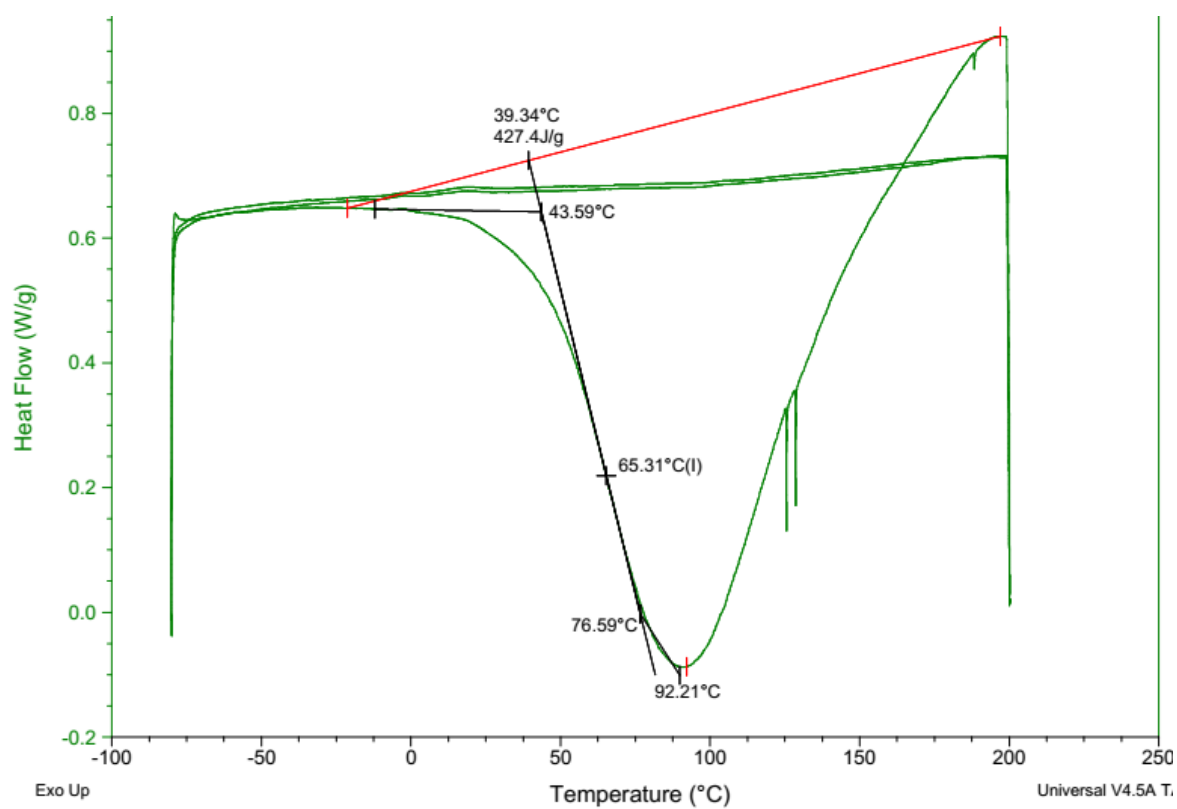

**Figure S6.** DSC analysis of Gel-DDA 2:1 cryogel 3 heating/cooling cycles.
